# Supplementary material
Source: PubMed Central journal article supplement (PMC1194956)

1

2

3

4

5

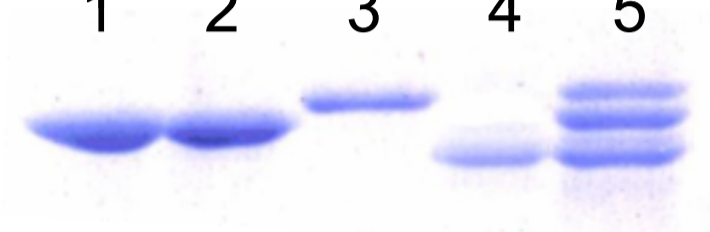

Supplement: pnas_0506025102_1.pdf [file pnas_0506025102_1.pdf]

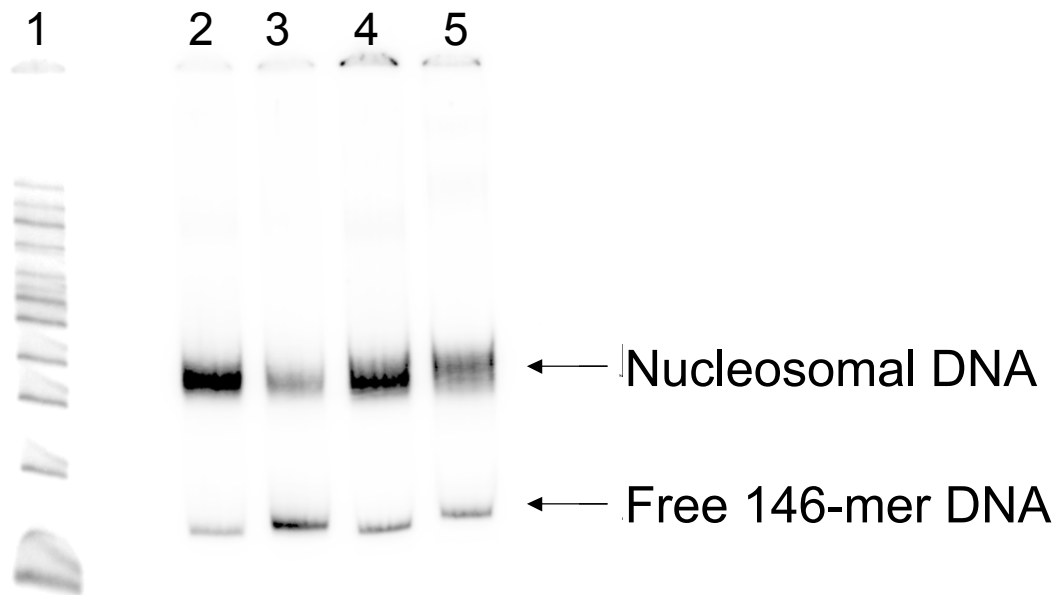

Supplement: pnas_0506025102_2.pdf [file pnas_0506025102_2.pdf]
